# Supplementary material for: Mechanism of action of novel piperazine containing compound toxicant against human liver cancer cells
Source: PeerJ journal article supplement (doi:10.7717/peerj.1588), 2016-03-17
Supplement: actin2.xlsx [file actin2.xlsx]

## Sheet: Sheet1
control	25 μM	12.5 μM	6.25 μM
700	415	460	600
