# Supplementary material for: Mechanism of action of novel piperazine containing compound toxicant against human liver cancer cells
Source: PeerJ journal article supplement (doi:10.7717/peerj.1588), 2016-03-17
Supplement: caspases_1.xlsx [file caspases_1.xlsx]

## Sheet: Sheet1
	0	6	12	18	24	30
caspase 3/7	1	2	2.8	3.9	4.5	4
caspase 8	1.1	1.9	3.4	5	5.3	5.1
caspase 9	1	2.5	3.9	5	4.7	4.2
