# Supplementary material for: Mechanism of action of novel piperazine containing compound toxicant against human liver cancer cells
Source: PeerJ journal article supplement (doi:10.7717/peerj.1588), 2016-03-17
Supplement: LDH.xlsx [file LDH.xlsx]

## Sheet: Sheet1
1.56	3.12	6.25
1.4	2.5	3.2
