# Supplementary material for: Mechanism of action of novel piperazine containing compound toxicant against human liver cancer cells
Source: PeerJ journal article supplement (doi:10.7717/peerj.1588), 2016-03-17
Supplement: nfkb_more.xlsx [file nfkb_more.xlsx]

## Sheet: Sheet1
TNF-α negative	TNF-α positive	TNF-α+1.56 µg/ml	TNF-α+3.12 µg/ml	TNF-α+6.25 µg/ml	TNF-α+12.5 µg/ml
135	355	345	297	147	130
