# Supplementary material for: Mechanism of action of novel piperazine containing compound toxicant against human liver cancer cells
Source: PeerJ journal article supplement (doi:10.7717/peerj.1588), 2016-03-17
Supplement: permiability_more.xlsx [file permiability_more.xlsx]

## Sheet: Sheet1
Control	1.56	3.12	6.25
250	270	281	347
