# Supplementary figures and images for: Mechanism of action of novel piperazine containing compound toxicant against human liver cancer cells
Source: PeerJ journal article supplement (doi:10.7717/peerj.1588), 2016-03-17

SNU-475

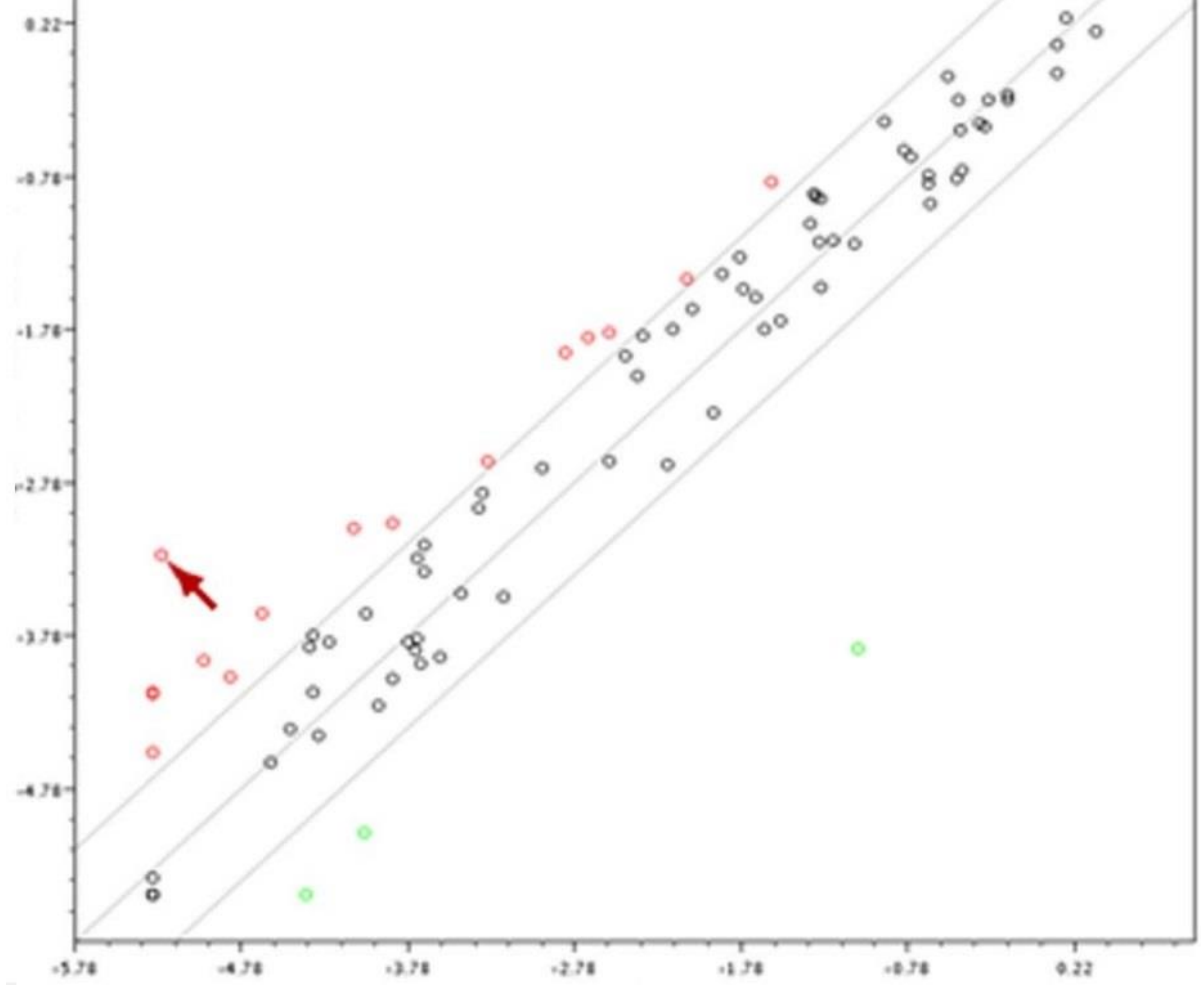

SNU-423

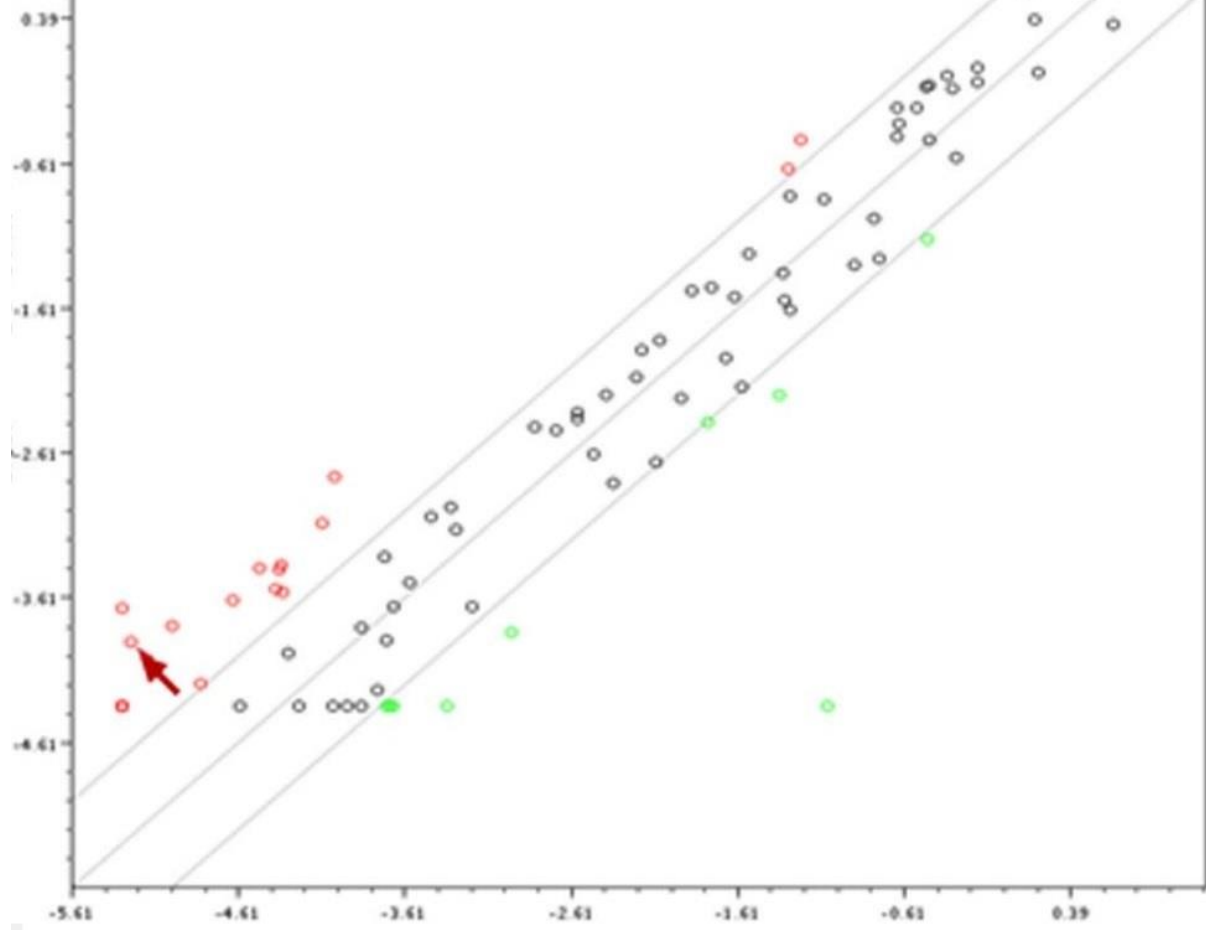

Supplement: PeerJ1588_Supplemental_Figures.pdf [file PeerJ1588_Supplemental_Figures.pdf]
